## CORRECTION

### **Bile acids alter the subcellular localization of CNT2 (concentrative nucleoside cotransporter) and increase CNT2-related transport activity in liver parenchymal cells**

S. FERNÁNDEZ-VELEDO, I. HUBER-RUANO, I. AYMERICH, S. DUFLOT, F. J. CASADO and M. PASTOR-ANGLADA

**Volume 395 (2006), pp. 337–344**

On p. 339, in the fourth sentence of the second paragraph of the ‘Bile acids up-regulate CNT2-related transport activity in liver parenchymal cells by modifying the subcellular localization of CNT2 protein’ section, for CTN2 read CNT2.
